# Supplementary material
Source: HighWire-hosted journal article supplement (https://n.neurology.org/content/suppl/2014/03/31/WNL.0b013e31829a340f)
Supplement: lam.pdf [file lam.pdf]

## 2형 근긴장디스트로피에서 하지불안증후군과 주간 졸음이 두드러진다

Restless legs syndrome and daytime sleepiness are prominent in myotonic dystrophy type 2

Erek M. Lam, MD  
 Paul W. Shepard, BA  
 Erik K. St. Louis, MD  
 Lucas G. Dueffert, BA  
 Nancy Slocumb  
 Stuart J. McCarter, BA  
 Michael H. Silber, MB, ChB  
 Bradley F. Boeve, MD  
 Eric J. Olson, MD  
 Virend K. Somers, MD, PhD  
 Margherita Milone, MD, PhD

**목적:** 1형 근긴장디스트로피(myotonic dystrophy type 1, DM1)에서 수면장애가 흔하지만, 2형 근긴장디스트로피(myotonic dystrophy type 2, DM2)의 수면장애에 대해서는 잘 알려져 있지 않다. 우리는 DM2에서 수면장애의 빈도를 확인하고자 하였다.

**방법:** 유전자검사로 확진된 54명의 DM2 환자와 DM1이나 DM2가 아닌 104명의 대조군으로 환자-대조군 연구를 하였고, 가능성 하지불안증후군(restless legs syndrome, RLS) 증상과 과도한 주간 졸림(excessive daytime sleepiness, EDS), 수면의 질, 피로, 폐쇄수면무호흡증후군(obstructive sleep apnea, OSA), 가능성 REM 수면 행동장애(probable REM sleep behavior disorder, pRBD)와 통증을 포함한 흔한 수면장애에 대해 조사하였다. 30명의 DM2 환자와 43명의 대조군이 조사에 응답하였다. EDS와 수면의 질이 나쁜 것을 종속변수로 하여 모수적 통계검정과 다중선형 회귀분석 및 로지스틱 회귀분석을 시행하였다.

**결과:** DM2와 대조군의 평균 연령은 각각 63.8세와 64.5세였다. 가능성 RLS 증상(60.0% vs 14.0%,  $p < 0.001$ ), EDS ( $p < 0.001$ ), 수면의 질( $p = 0.02$ )과 피로( $p < 0.0001$ )를 포함한 수면장애는 DM2 환자에서 대조군보다 유의하게 많이 관찰되었다. EDS와 피로증상은 나이, 성별, RLS와 통증 점수를 보정한 후에도 DM2와 독립적으로 연관되어 있었다( $p < 0.01$ ). OSA ( $p = 0.87$ )나 pRBD ( $p = 0.12$ )의 점수는 두 그룹에서 차이가 없었다.

**결론:** RLS, EDS 및 피로가 DM2 환자에서 흔한 수면장애인 반면, OSA와 pRBD 증상은 흔하지 않았다. EDS는 DM2 진단과 독립적으로 연관되어 있어, 일차성 중추신경계 과다수면증 기전으로 발병함을 시사한다. DM2에 동반된 수면장애를 더 잘 특성화하기 위해서는 객관적인 수면 평가를 이용한 추가 연구가 필요하다.

Neurology® 2013;81:157-164

Figure 1 An illustration of survey response rates in DM2 patient and control groups

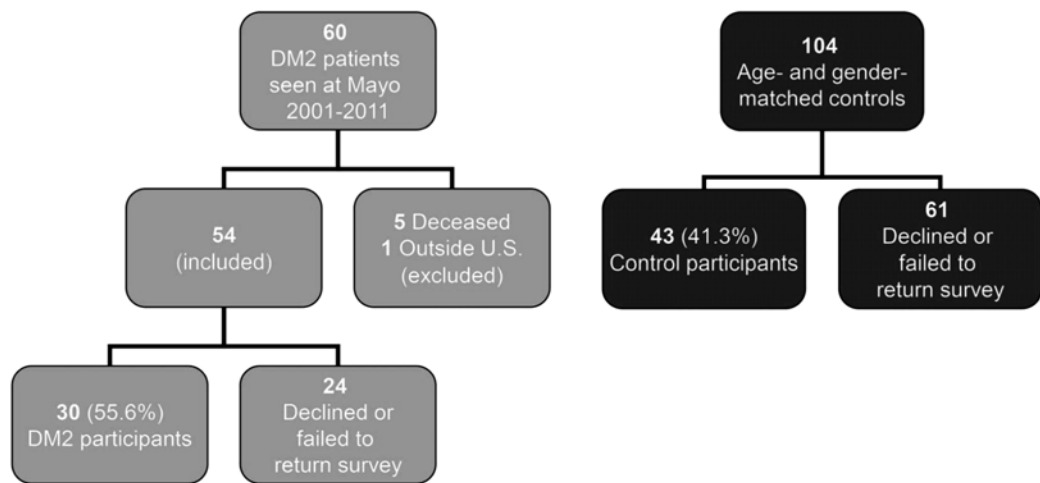

Sixty subjects with myotonic dystrophy type 2 (DM2) were seen over a decade span at our institution, with 54 of these subjects surveyed, of whom 30 (55.6%) responded. A total of 104 age- and sex-matched medical controls were also surveyed, of whom 43 (41.3%) responded.

| Table Demographic, comorbidity, medication, and questionnaire data |                         |                         |         |
|--------------------------------------------------------------------|-------------------------|-------------------------|---------|
| Demographics                                                       | DM2                     | Controls                | p Value |
| Participants, n                                                    | 30                      | 43                      | —       |
| Female, %                                                          | 70.0                    | 74.4                    | 0.68    |
| Age, y, mean (SD); range                                           | 63.83 (9.94); 42-84     | 64.53 (8.05); 42-80     | 0.59    |
| BMI, kg/m <sup>2</sup> , mean (SD); range                          | 27.14 (5.12); 18.1-38.4 | 27.53 (5.53); 18.0-42.7 | 0.85    |
| Smoking history, %                                                 | 36.7                    | 41.9                    | 0.66    |
| Smoking currently, %                                               | 3.3                     | 0                       | 0.23    |
| Years smoking, mean (SD); range                                    | 4.61 (9.80); 0-30       | 5.71 (9.84); 0-35       | 0.5     |
| <b>Comorbidities, %</b>                                            |                         |                         |         |
| Hypertension                                                       | 40.0                    | 37.2                    | 0.81    |
| Cardiovascular disease                                             | 23.2                    | 20.9                    | 0.81    |
| Cerebrovascular disease                                            | 3.3                     | 4.7                     | 0.78    |
| COPD                                                               | 0                       | 0                       | 1.00    |
| Diabetes                                                           | 23.3                    | 7.0                     | 0.046   |
| Thyroid disease                                                    | 26.7                    | 18.6                    | 0.41    |
| Renal disease                                                      | 0                       | 4.7                     | 0.23    |
| Cancer                                                             | 30.0                    | 37.2                    | 0.52    |
| Depression                                                         | 13.3                    | 18.6                    | 0.55    |
| Anxiety                                                            | 3.3                     | 9.3                     | 0.59    |
| Peripheral neuropathy                                              | 13.3                    | 9.3                     | 0.59    |
| Cataracts                                                          | 60.0                    | 41.9                    | 0.13    |
| <b>Medication use, %</b>                                           |                         |                         |         |
| Narcotic use                                                       | 6.7                     | 9.3                     | 0.69    |
| Hypnotic use                                                       | 13.3                    | 14.0                    | 0.94    |
| Antidepressant use                                                 | 16.7                    | 30.2                    | 0.19    |
| Other CNS-active drug use                                          | 20.0                    | 9.3                     | 0.19    |
| <b>Questionnaires</b>                                              |                         |                         |         |
| ESS score, mean (SD); range                                        | 7.87 (5.09); 0-17       | 5.62 (3.80); 0-16       | 0.086   |
| ESS >10, %                                                         | 30.0                    | 14.0                    | 0.095   |
| DSS score, mean (SD); range                                        | 6.03 (2.97); 1-11       | 3.51 (2.20); 0-9        | <0.001  |
| DSS score ≥7, %                                                    | 43.3                    | 7.0                     | <0.001  |
| FSS score, mean (SD); range                                        | 4.44 (1.73); 1.00-7.00  | 2.59 (1.31); 1.00-5.33  | <0.0001 |
| FSS ≥4, %                                                          | 58.6                    | 16.3                    | <0.001  |
| PSQI score, mean (SD); range                                       | 7.97 (4.05); 0-18       | 5.78 (3.85); 1-18       | 0.021   |
| PSQI >5, %                                                         | 66.7                    | 47.5                    | 0.11    |
| SA-SDQ score, mean (SD); range                                     | 27.19 (5.48); 18-36     | 27.37 (6.00); 14-39     | 0.87    |
| Clinically significant SA-SDQ score, %                             | 11.1                    | 14.0                    | 0.77    |
| RBD from MSQ, %                                                    | 4.8                     | 19.4                    | 0.12    |
| CH-RLSq RLS, %                                                     | 60.0                    | 14.0                    | <0.0001 |
| Pain score, mean (SD); range                                       | 6.93 (5.02); 0-18       | 5.15 (3.87); 0-18       | 0.18    |

Abbreviations: BMI = body mass index; CH-RLSq = Cambridge-Hopkins Questionnaire for Ascertainment of RLS; COPD = chronic obstructive pulmonary disease; DM2 = myotonic dystrophy type 2; DSS = Daytime Sleepiness Scale; ESS = Epworth Sleepiness Scale; FSS = Fatigue Severity Scale; MSQ = Mayo Sleep Questionnaire; PSQI = Pittsburgh Sleep Quality Index; RBD = REM sleep behavior disorder; SA-SDQ = Sleep Apnea scale of the Sleep Disorders Questionnaire.

Figure 2 Sleep disturbances in patients with DM2 and controls

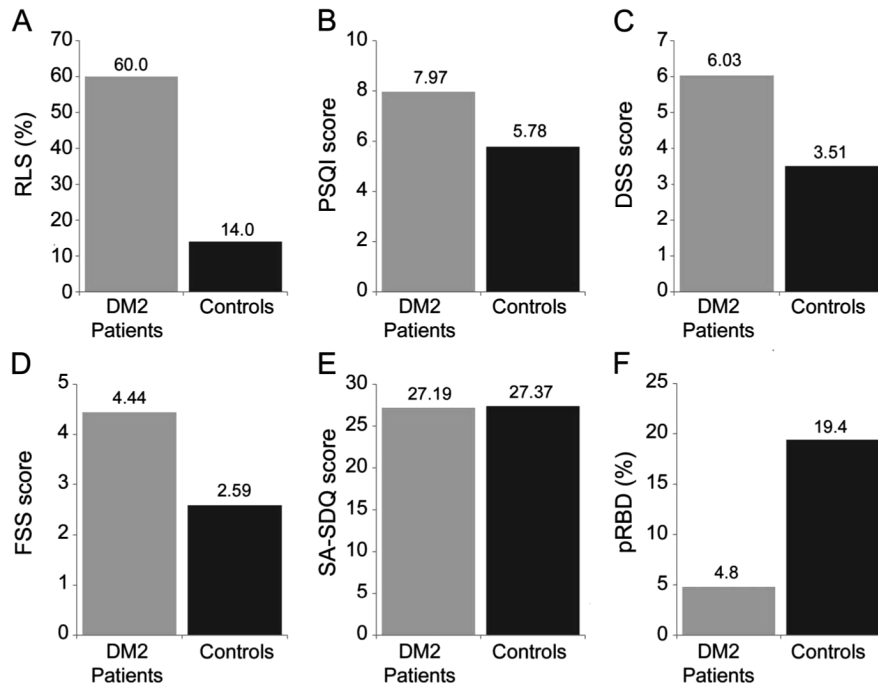

Comparisons between patients with myotonic dystrophy type 2 (DM2) and controls in percent with reported restless legs syndrome (RLS) symptoms (A), Pittsburgh Sleep Quality Index (PSQI) scores (B), Daytime Sleepiness Scale (DSS) scores (C), Fatigue Severity Scale (FSS) scores (D), Sleep Apnea scale of the Sleep Disorders Questionnaire (SA-SDQ) scores (E), and percent with probable REM sleep behavior disorder (pRBD) (F).
